# Supplementary material for: Identification of Suitable Reference Genes for Studying Expression of Cell Wall-Related and Developmental Associated Genes in Mungbean (Vigna radiata (L.) Wilczek)
Source: Research Square preprint supplement (doi:10.21203/rs.3.rs-7154578/v1), 2025-08-06
Supplement: Supplementary file 1 [file 4c58c3e0ad5bbb57c3f57f16.xlsx]

## Sheet: Table S1
Table S1 : Ranking of candidate genes based on expression stability using GeNorm algorithm
	Expression stability (M)
Gene	Leaf	Stem
HSP90	0.267	0.185
IF4a	0.094	0.168
H2A	0.119	0.134
PolyUB	0.103	0.161
Lectin	0.086	0.167
TIP41	0.092	0.15
Actin	0.093	0.132
CYP1	0.097	0.12
EF1	0.08	0.106
GAPDH	0.097	0.106

## Sheet: Table S2
Table S2: Ranking of candidate genes based on expression stability using NormFinder algorithm
	Stability analysis
Gene name	Stem	Leaf
GAPDH	0.005	0.051
EF1	0.015	0.013
CYP1	0.05	0.052
Actin	0.059	0.031
Lectin	0.097	0.006
TIP41	0.085	0.045
IF4a	0.096	0.008
H2A	0.062	0.052
PolyUB	0.096	0.06
HSP90	0.112	0.183
